1 **Trends of enterovirus D68 concentrations in wastewater in two California**  
2 **communities parallel trends of statewide confirmed cases, February 2021 – April**  
3 **2023**

4  
5 Alexandria B. Boehm<sup>1\*\*</sup>, Debra A. Wadford<sup>2\*</sup>, Bridgette Hughes<sup>3</sup>, Dorothea Duong<sup>3</sup>, Alice  
6 Chen<sup>2</sup>, Tasha Padilla<sup>2</sup>, Chelsea Wright<sup>2</sup>, Lisa Moua<sup>2</sup>, Teal Bullick<sup>2</sup>, Maria Salas<sup>2</sup>, Christina  
7 Morales<sup>2</sup>, Bradley J. White<sup>3</sup>, Carol A. Glaser<sup>4</sup>, Duc J. Vugia<sup>5</sup>, Alexander T. Yu<sup>5</sup>, Marlene K,  
8 Wolfe<sup>6</sup>

- 9  
10 1. Department of Civil and Environmental Engineering, Stanford University, Stanford,  
11 California, USA  
12 2. California Department of Public Health, Center for Laboratory Sciences, Viral and  
13 Rickettsial Disease Laboratory, Richmond, California, USA  
14 3. Verily Life Sciences, South San Francisco, California, USA  
15 4. California Department of Public Health, Center for Laboratory Sciences, Office of the  
16 State Public Health Laboratory Director, Richmond, California, USA  
17 5. California Department of Public Health, Center for Infectious Diseases, Infectious  
18 Diseases Branch, Richmond, California, USA  
19 6. Gangarosa Department of Environmental Health, Rollins School of Public Health, Emory  
20 University, Atlanta, Georgia, USA

21  
22 \* Indicates co-first authors

23 # Corresponding author: Alexandria B. Boehm, Stanford University, 473 Via Ortega, room 189,  
24 Stanford, California, USA 94305, [aboehm@stanford.edu](mailto:aboehm@stanford.edu), 650-724-9128 (tel)

25  
26 *The findings and conclusions in this report are those of the authors and do not necessarily*  
27 *represent the views of the California Department of Public Health or the California Health and*  
28 *Human Services Agency.*

29  
30 **Abstract**

31 In this retrospective study, enterovirus D68 (EVD68) genomic RNA in wastewater solids was  
32 measured longitudinally at two California wastewater treatment plants twice per week for 26  
33 months. EVD68 RNA was undetectable except when concentrations increased between mid-  
34 July and mid-December 2022, during which time EVD68 cases were confirmed in the state.

35  
36 **Background**

37 Enterovirus D68 (EVD68) was first recognized as a respiratory virus in 1962<sup>1</sup>. In 2014,  
38 unprecedented large outbreaks of EVD68 associated with severe respiratory illnesses occurred  
39 in children in the United States (US)<sup>2</sup>, which coincided with a subsequent rise in cases of acute  
40 flaccid myelitis (AFM)<sup>3</sup>. The US Centers for Disease Control and Prevention (CDC) began active  
41 AFM monitoring in 2014, and as of July 2023, there have been 729 confirmed cases<sup>4</sup>. Most  
42 patients develop AFM between August and November. Cyclical peaks in AFM incidence were  
43 observed every two years (2014, 2016, and 2018) prior to the COVID-19 pandemic.

44

45 CDC began active sentinel surveillance for EVD68 in 2017 through the New Vaccine  
46 Surveillance Network and detected a greater number of EVD68 cases during July-August 2022<sup>5</sup>.  
47 However, there is no formal state or local EVD68 surveillance. With the emergence of  
48 wastewater surveillance (WWS) as a method to monitor pathogens at various population levels<sup>6</sup>,  
49 we sought to assess the feasibility of applying WWS to better understand EVD68 circulation.  
50 WWS could provide an early alert system for public health authorities to mitigate possible  
51 increases in severe acute respiratory illness and AFM, and to enhance physician awareness  
52 during times of increased circulation. Two recent studies reported EVD68 RNA in wastewater in  
53 2021 and concordance with confirmed infections in Israel and UK<sup>7,8</sup>. In this retrospective,  
54 longitudinal study, we developed an EVD68 assay, deployed it for WWS and compared WWS  
55 with laboratory-confirmed EVD68 cases.

56

### 57 **This Study**

58 We tested the EVD68-specific primers and probe developed by Wylie et al<sup>9</sup> for their sensitivity  
59 and specificity *in silico*, and *in vitro* against virus panels, intact viruses, and cDNA gene blocks  
60 (see Appendix for *in vitro* testing details). *In silico* and *in vitro* testing indicated no cross  
61 reactivity with non-EVD68 sequences deposited in National Center for Biotechnology  
62 Information (NCBI) and non-target viral gRNA, respectively. However, the assay did not detect  
63 the EVD68 variant circulating in fall 2022 in the Northern Hemisphere (EVD68-2022). We  
64 therefore developed a new set of primers, and modified the probe, to amplify and detect in  
65 EVD68-2022 the same region of the polyprotein region (VP1) gene targeted by the Wylie assay.  
66 EVD68-2022 genome sequences were downloaded from NCBI in September 2022, aligned to  
67 identify conserved regions in VP1, and primers and probes were developed *in silico* (Table A1).  
68 New primers and probes were confirmed to be specific and sensitive *in silico* and *in vitro*. The  
69 EVD68 assay used in this study includes two forward and two reverse primers in order to  
70 ensure detection of all EVD68 variants (Table 1).

71

72 Wastewater solids samples were retrospectively selected from biobanked samples collected as  
73 part of a prospective WWS program. Samples were selected from San Jose (SJ) and  
74 Oceanside (OSP) wastewater treatment plants, serving 1.5 million people in Santa Clara  
75 County, CA, and 250,000 people in San Francisco County, CA, respectively (Figure A1). Two  
76 samples from each site per week collected between 2/1/21 and 4/14/23 were analyzed.  
77 Wastewater solids were thawed overnight; nucleic acids were extracted from 10 replicate  
78 sample aliquots as described elsewhere<sup>10</sup>. RNA was used as template in 10 replicate digital  
79 droplet RT-PCR wells for each sample to measure EVD68 RNA. We measured pepper mild  
80 mottle virus (PMMoV) RNA as an endogenous control. Details of RT-PCR chemistry and data  
81 processing are provided in the Appendix. Results are reported as copies per gram dry weight of  
82 solids (cp/g) and errors are 68% confidence intervals. The lower limit of detection is  
83 approximately 500 cp/g.

84

85 Between February 2021 and April 2023, EVD68 RNA concentrations in wastewater solids were  
86 non-detectable except for samples collected between mid-July and mid-December 2022. During  
87 this time, EVD68 RNA concentrations increased to approximately 10<sup>5</sup> cp/g in mid-October at  
88 both plants (Figure 1a-b). Plots of EVD68 normalized by PMMoV are similar (Figure A2a-b).

89  
90 Although there is no active EVD68 surveillance in California, CDPH Viral and Rickettsial  
91 Disease Laboratory (VRDL) accepts EV-reactive specimens from hospitals, clinics, and local  
92 public health laboratories for strain typing. EV typing allows us to know, at a limited level, which  
93 EV types are circulating and associated with illness. Since 2020, CDPH VRDL has maintained  
94 an AFM surveillance program with CDC<sup>11</sup>. This enhanced AFM surveillance captures patient  
95 information but is not specific for EVD68, per se. However, EV testing and typing are conducted  
96 when warranted. The thirty-five EVD68 samples confirmed by VRDL from January 2021 through  
97 April 2023 are shown aggregated by week (Figure 1c).

98  
99 Trends in EVD68 RNA wastewater concentrations at the two California communities match the  
100 trend in the state-aggregate, weekly-aggregated laboratory-confirmed EVD68 cases (Figure 1).  
101 Weekly median wastewater EVD68 RNA concentrations were positively correlated to weekly  
102 case counts (Kendall's tau=0.47 and 0.50 for SJ and OSP respectively,  $p < 0.001$ ).

103  
104 This study was reviewed by the State of California Health and Human Services Agency  
105 Committee for the Protection of Human Subjects and determined to be Exempt from oversight.

## 106 107 **Conclusions**

108 Detection of EVD68 in wastewater over 26 months in two California communities corresponded  
109 strikingly with the trend of statewide laboratory-confirmed EVD68 cases. Passive EV  
110 surveillance and sentinel EVD68 surveillance in the US do not detect the majority of EV cases  
111 and focus primarily on the most severe EV cases causing acute respiratory illness, meningitis,  
112 and AFM. Most individuals infected with EV are either asymptomatic or have mild symptoms  
113 and would not likely be tested. For those who are tested, EV-specific testing is rare and a  
114 presumptive diagnosis is often based on the rhinovirus/enterovirus test on a respiratory virus  
115 panel assay without further characterization. Even in cases where EVD68 is identified, EVD68  
116 infection is not a reportable disease and not necessarily captured in public health surveillance  
117 systems. During July-December 2022 when EVD68 RNA was detected and peaked in  
118 wastewater, case data were sparse, even when aggregated at the state level, as shown in  
119 Figure 1c.

120  
121 Given that known recent EVD68 surges have been associated with severe pediatric respiratory  
122 illness and coincided with increased numbers of AFM cases, there is a benefit to enhancing  
123 EVD68 surveillance so that its circulation dynamics are better understood. According to the data  
124 reported herein, WWS can be applicable for this purpose. Because results from WWS are  
125 available 24 hours after sample collection, early warning about increases in circulating EVD68  
126 can be provided to communities being monitored, irrespective of clinical testing. WWS for  
127 EVD68 can inform public health action, including when to issue alerts to clinicians of the  
128 potential for severe respiratory illnesses and AFM cases. Clinician awareness is critical for  
129 effective patient care because early recognition of severe cases, including AFM, will prevent  
130 unnecessary testing for other etiologies, optimize patient management, and may improve  
131 outcomes<sup>11</sup>. Our findings suggest such surveillance is possible through routine EVD68  
132 monitoring of wastewater.

133

## 134 Acknowledgments

135 We acknowledge Hugo Guevara and Chao-Yang Pan for their contributions to the EVD68 case  
136 surveillance and Vikram Chan-Herur for his support on assay design. B. White, D. Duong, and  
137 B. Hughes are employees of Verily Life Sciences; other authors declare no competing interests.

138

## 139 References

- 140 (1) Schieble, J. H.; Fox, V. L.; Lennette, E. H. A Probable New Human Picornavirus Associate  
141 with Respiratory Disease. *American Journal of Epidemiology* **1967**, *85* (2), 297–310.  
142 <https://doi.org/10.1093/oxfordjournals.aje.a120693>.
- 143 (2) Brown, B. A.; Nix, W. A.; Sheth, M.; Frace, M.; Oberste, M. S. Seven Strains of Enterovirus  
144 D68 Detected in the United States during the 2014 Severe Respiratory Disease Outbreak.  
145 *Genome Announc* **2014**, *2* (6). <https://doi.org/10.1128/genomeA.01201-14>.
- 146 (3) Leshem, E. Notes from the Field: Acute Flaccid Myelitis among Persons Aged  $\leq 21$  Years -  
147 United States, August 1-November 13, 2014. *MMWR Morb Mortal Wkly Rep* **2015**, *63* (53),  
148 1243–1244.
- 149 (4) Centers for Disease Control and Prevention. *Acute Flaccid Myelitis*.  
150 <https://www.cdc.gov/acute-flaccid-myelitis/index.html> (accessed 2023-07-13).
- 151 (5) United States Center for Disease Control and Prevention Health Alert Network. *Severe*  
152 *Respiratory Illnesses Associated with Rhinoviruses and/or Enteroviruses Including EV-D68*  
153 *– Multistate, 2022*. Severe Respiratory Illnesses Associated with Rhinoviruses and/or  
154 Enteroviruses Including EV-D68 – Multistate, 2022.  
155 <https://emergency.cdc.gov/han/2022/han00474.asp> (accessed 2023-07-17).
- 156 (6) Boehm, A. B.; Hughes, B.; Duong, D.; Chan-Herur, V.; Buchman, A.; Wolfe, M. K.; White, B.  
157 J. Wastewater Concentrations of Human Influenza, Metapneumovirus, Parainfluenza,  
158 Respiratory Syncytial Virus, Rhinovirus, and Seasonal Coronavirus Nucleic-Acids during the  
159 COVID-19 Pandemic: A Surveillance Study. *The Lancet Microbe* **2023**, *4* (5), e340–e348.  
160 [https://doi.org/10.1016/S2666-5247\(22\)00386-X](https://doi.org/10.1016/S2666-5247(22)00386-X).
- 161 (7) Erster, O.; Bar-Or, I.; Levy, V.; Shatzman-Steuerman, R.; Sofer, D.; Weiss, L.; Vasserman,  
162 R.; Fratty, I. S.; Kestin, K.; Elul, M.; Levi, N.; Alkrenawi, R.; Mendelson, E.; Mandelboim, M.;  
163 Weil, M. Monitoring of Enterovirus D68 Outbreak in Israel by a Parallel Clinical and  
164 Wastewater Based Surveillance. *Viruses* **2022**, *14* (5). <https://doi.org/10.3390/v14051010>.
- 165 (8) Tedcastle, A.; Wilton, T.; Pegg, E.; Klapsa, D.; Bujaki, E.; Mate, R.; Fritzsche, M.;  
166 Majumdar, M.; Martin, J. Detection of Enterovirus D68 in Wastewater Samples from the UK  
167 between July and November 2021. *Viruses* **2022**, *14* (1). <https://doi.org/10.3390/v14010143>.
- 168 (9) Wylie, T. N.; Wylie, K. M.; Buller, R. S.; Cannella, M.; Storch, G. A. Development and  
169 Evaluation of an Enterovirus D68 Real-Time Reverse Transcriptase PCR Assay. *Journal of*  
170 *Clinical Microbiology* **2015**, *53* (8), 2641–2647. <https://doi.org/10.1128/jcm.00923-15>.
- 171 (10) Boehm, A. B.; Wolfe, M. K.; Wigginton, K. R.; Bidwell, A.; White, B. J.; Hughes, B.;  
172 Duong; Chan-Herur, V.; Bischel, H. N.; Naughton, C. C. Human Viral Nucleic Acids  
173 Concentrations in Wastewater Solids from Central and Coastal California USA. *Scientific*  
174 *Data* **2023**, *10*, 396.
- 175 (11) Kidd, S.; Lopez, A. S.; Konopka-Anstadt, J. L.; Nix, W. A.; Routh, J. A.; Oberste, M. S.  
176 Enterovirus D68-Associated Acute Flaccid Myelitis, United States, 2020. *Emerg Infect Dis*  
177 **2020**, *26* (10). <https://doi.org/10.3201/eid2610.201630>.

178 Figure 1. EVD68 RNA concentrations in wastewater solids at a. San Jose (SJ) and b.  
179 Oceanside (OSP) wastewater treatment plants, and c. weekly- and state-aggregated laboratory-  
180 confirmed EVD68 cases (bottom). Error bars on wastewater measurements represent 68%  
181 confidence intervals. Black lines on wastewater data represent five-sample trimmed means.  
182

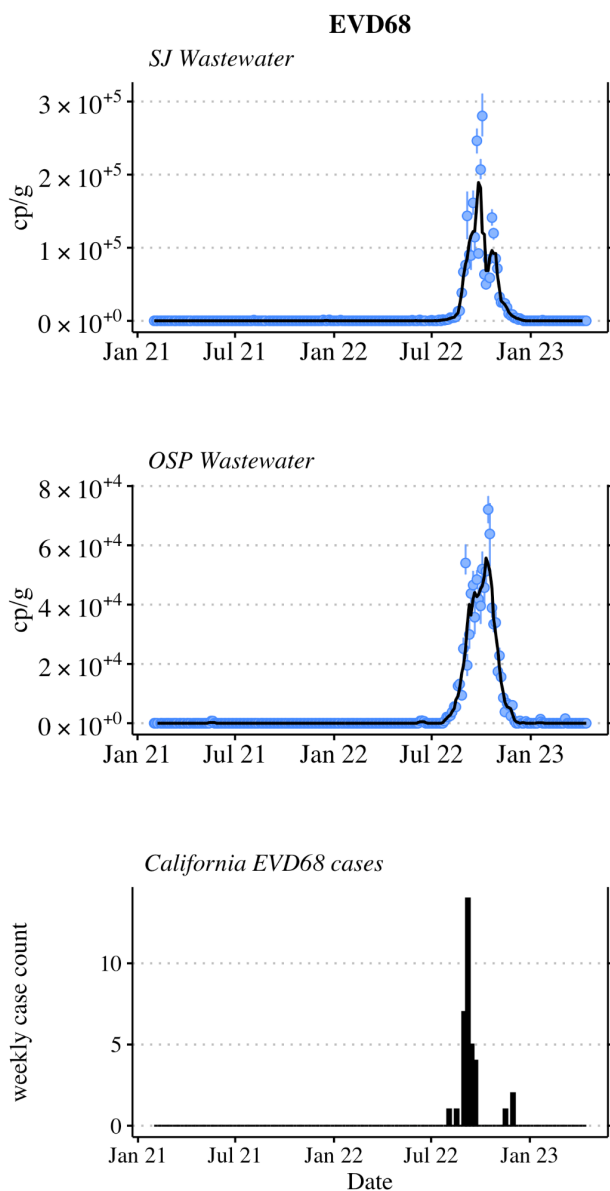

183  
184  
185

186 Table 1. Forward and reverse primers and probe used in this study.  
187

| Target    | Primer/Probe | Sequence                                         |
|-----------|--------------|--------------------------------------------------|
| EVD68 VP1 | Forward      | CACYGAACCAGARGAAGCCA<br>CACTGAACCAGAGGAAGCTA     |
|           | Reverse      | CCAAAGCTGCTCTACTGAGAAA<br>CTAAAGCTGCCCTACTAAGRAA |
|           | Probe        | TCGCACAGTGATAAATCRACAYGG                         |

188
